# Supplementary material for: Ionic Liquid-Polypyrrole-Gold Composites as Enhanced Enzyme Immobilization Platforms for Hydrogen Peroxide Sensing
Source: MDPI journal article supplement (doi:10.3390/s19030640), 2019-02-03
Supplement: s1 [file s1]

# Ionic Liquid-Polypyrrole-Gold Composites as Enhanced Enzyme Immobilization Platforms for Hydrogen Peroxide Sensing

Meng Li<sup>1</sup>, Jing Wu<sup>1</sup>, Haiping Su<sup>1</sup>, Yan Tu<sup>1</sup>, Yazhuo Shang<sup>1,\*</sup>, Yifan He<sup>2,\*</sup>, Honglai Liu<sup>1</sup>

<sup>1</sup> Key Laboratory for Advanced Materials, School of Chemistry and Molecular Engineering, East China University of Science and Technology, Shanghai 200237, China; shangyazhuo@ecust.edu.cn

<sup>2</sup> Department of Biotechnology, School of Sciences, Beijing Technology and Business University, Beijing 100048, China; heyifan@btbu.edu.cn

\* Correspondence: shangyazhuo@ecust.edu.cn; Tel.: +86-21-6425-2767 (Y.Z.S.)

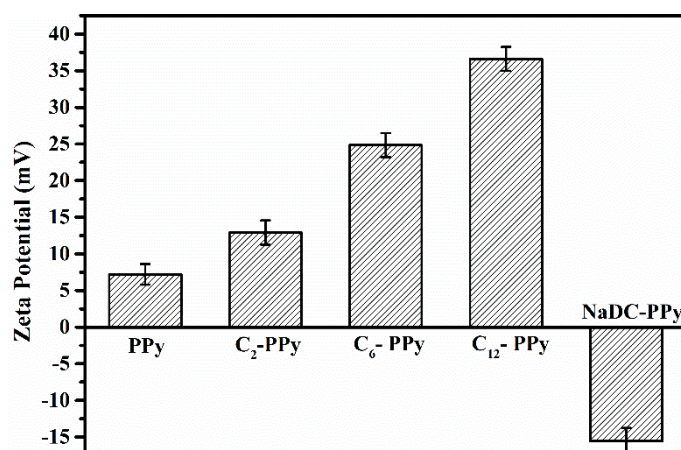

**Figure S1.** Zeta potential of different samples prepared in water, [C<sub>2</sub>min]Br (1 M), [C<sub>6</sub>min]Br (1 M), [C<sub>12</sub>min]Br (1M), NaDC (0.5 M) solutions respectively.

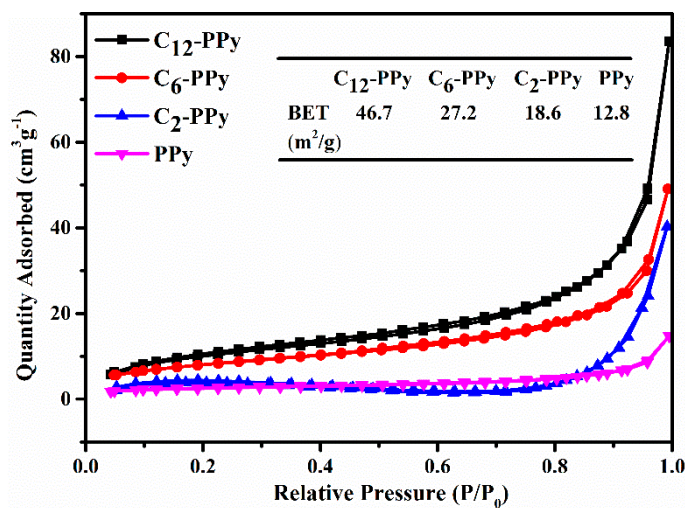

**Figure S2.** Nitrogen adsorption-desorption isotherms and BET surface area (inset) of C<sub>12</sub>-PPy, C<sub>6</sub>-PPy, C<sub>2</sub>-PPy and PPy.

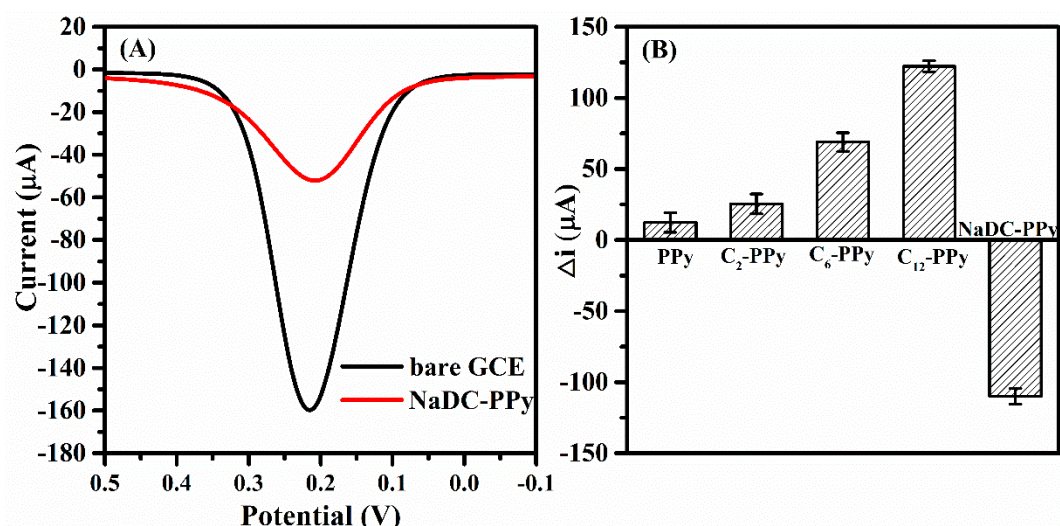

**Figure S3.** (A) DPV response of bare GCE and NaDC-PPy/GCE in 0.01 M PBS containing 5 mM  $\text{Fe}[(\text{CN})_6]^{3-/4-}$  and 0.1 M KCl (pH 7.0). (B) Comparison of current response variation of GCE modified by different material.

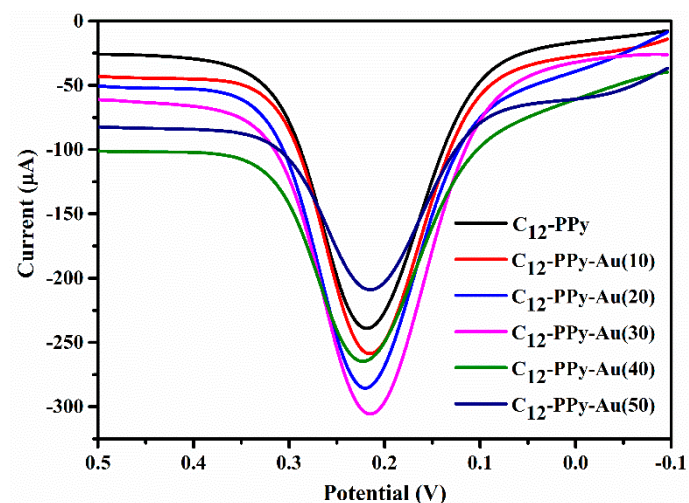

**Figure S4.** DPV response of  $\text{C}_{12}$ -PPy-Au/GCE obtained by scanning  $\text{C}_{12}$ -PPy/GCE for 10, 20, 30, 40, and 50 segments in 1 mM  $\text{HAuCl}_4$  solution at a scan rate of  $50 \text{ mVs}^{-1}$  respectively.
